# Supplementary material for: Antitumor effects of a monoclonal antibody to human CCR9 in leukemia cell xenografts
Source: PubMed Central journal article supplement — MAbs. 2014 May 7;6(4):1000–12. doi: 10.4161/mabs.29063 (PMC4171004; doi:10.4161/mabs.29063), 2014-05-07
Supplement: mabs-6-1000-s01.pdf [file mabs-6-1000-s01.pdf]

## **Supplemental Material to:**

**Sonia Chamorro, Maria Vela, Ana Franco,  
Laura Carramolino, Julio Gutiérrez, Lucio Gómez,  
María Lozano, Beatriz Salvador, Mónica García-Gallo,  
Carlos Martínez-A, and Leonor Kremer**

**Antitumor effects of a monoclonal antibody  
to human CCR9 in leukemia cell xenografts**

**mAbs 2014; 6(4)**

**<http://dx.doi.org/10.4161/mabs.29063>**

**<http://www.landesbioscience.com/journals/mabs/article/29063/>**

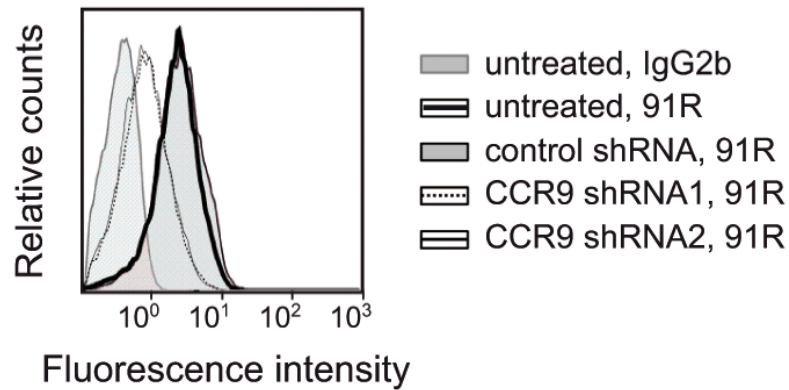

### Supplementary Figure S1:

#### *91R binding to CCR9-silenced MOLT-4 cells*

Untreated, control shRNA-, hCCR9 shRNA1- or hCCR9 shRNA2-infected MOLT-4 cells were analyzed by flow cytometry using 91R or isotype control antibody. One representative experiment is shown of three.

### Supplementary Materials and Methods:

#### *Lentivirus-mediated shRNA silencing*

shRNAi lentiviral particles were prepared using the lentivirus-compatible vectors pCMV-dR8.91 and pMD2.G (Addgene); and non-target-shRNA control or CCR9-shRNA (Mission SHCLNG\_10051011MN, Sigma-Aldrich). Each shRNA vector was cotransfected with pCMV-dR8.91 and pMD2.G in the HEK-293T cell line (using Opti-MEM, Invitrogen). At 48 h post-transfection, medium containing viruses was collected and filtered through a 0.45  $\mu$ m filter (*Tiscornia et al. 2006*). Viral titer was determined by standard procedures.

MOLT-4 cells ( $2 \times 10^5$ ) were plated in 1 ml complete medium 24 h before infection with 350 plaque-forming units (pfu) of the indicated pseudovirus (48 h). Cells were cultured for an additional 7 days in complete medium supplemented with puromycin (2  $\mu$ g/ml) to select lentivirus-infected cells prior to flow cytometry analysis of CCR9 expression using 91R antibody.

- Tiscornia G, Singer O, Verma IM. Production and purification of lentiviral vectors. *Nature Protocols*. 2006. 1:241-245.
